# Supplementary material
Source: PubMed Central journal article supplement (PMC7791014)
Supplement: mmc1.pdf [file mmc1.pdf]

YMTHE, Volume 29

## **Supplemental Information**

**TV-circRGP6 Nanoparticle Suppresses**

**Breast Cancer Stem Cell-Mediated**

**Metastasis via the miR-26b/YAF2 Axis**

**Xiaoti Lin, Weiyu Chen, Fengqin Wei, and Xiaoming Xie**

## **SUPPLEMENTAL INFORMATION**

**Supplemental Experimental Procedures**

**Supplementary Tables S1-4**

**Supplementary Figures S1-7**

## Supplemental Experimental Procedures

### Patients and animal studies

Informed consent was obtained from all patients. All animal experiments and related studies were approved by the research ethics committee of Sun Yat-sen University Cancer Center (SYSUCC).

### Cell culture and transfection procedure of breast cancer stem cells (BCSC)

Tumor tissue-derived BCSC (XM322 and XM607) were isolated by fluorescence-activated cell sorting (FACS) as previously described.<sup>1</sup> Cell line-derived BCSC (MDA-MB-231.SC and MCF-7.SC) were purified by magnetic-activated cell sorting (MACS).<sup>2</sup> The application of culture medium was as described previously. BCSC were maintained as spheres in ultralow attachment flasks in serum-free DMEM-F12 and supplemented with 10 ng/mL basic fibroblast growth factor (BFGF), 20 ng/mL epidermal growth factor (EGF), 2% B27, 5 µg/mL insulin, and 10000 IU/mL penicillin-streptomycin. BCSC were maintained as spheres in ultralow attachment flasks in serum-free DMEM-F12 and supplemented with 10 ng/mL basic fibroblast growth factor (BFGF), 20 ng/mL epidermal growth factor (EGF), 2% B27, 5 µg/mL insulin, and 10000 IU/mL penicillin-streptomycin. For preparing of single cell suspensions, BCSC were digested by TrypLE™ Express for 9 min. To establish adherent cells in differentiation culture, we added 0.50% bovine serum albumin to nutrient solution for 12 days.

MDA-MB-231, MCF-7, MDA-MB-468 and SK-br-3 breast cancer cell lines, and immortalized normal mammary epithelial cell lines (MCF-12A, 184A1) were all purchased from American Type Culture Collection (ATCC). All cell lines were cultured according to the vendor's instructions. Briefly, the breast cancer cells were maintained under DMEM medium supplemented with 10% fetal bovine serum (FBS, GIBCO, Campinas, Brazil). Immortalized normal mammary epithelial cells were raised under Mammary Epithelium Basal Medium (Clonetics, Walkersville, MD). All cells were bred at 37°C in a 5% CO<sub>2</sub> incubator.

Cholesterol and 1, 2-bis(oleoyloxy)-3-(trimethyl ammonio) propane (DOTAP; Avanti Polar Lipids, Alabaster, AL), were extruded and DOTAP: cholesterol liposomes were performed according to the protocol. Briefly, to evaluate the

1 inhibitory effects on BCSC, the cells were transiently cotransfected in 24-well plates  
2 with 1mg of the TV plasmid DNA plus 0.1mg of CMV-Luc DNA using extruded  
3 DOTAP:cholesterol liposomes at an N/P ratio of 2:1 secons.

4 **Patients, tissues, tissue microarray construction (TMA), immunohistochemistry**  
5 **(IHC) and *in situ* hybridization (ISH)**

6 A total of 1691 female patients with breast cancer who hospitalized in SYSUCC from  
7 October 2001 to September 2013 were enrolled in our study. A complete patient  
8 follow-up was performed, and endpoint of this follow-up was August 2017.  
9 Expression data were obtained from 248 fresh-frozen resected breast specimens  
10 consisting of 165 tumor tissues and 83 adjacent normal breast tissues. Antibodies of  
11 YAF2 (1: 100) was performed. A total of 12 mouse tissues were involved in analyzing  
12 of IHC expressions. The primary antibodies included ER (1:50), PR (1:500), HER2  
13 (1:50), Ki-67 (1:100), E-Cadherin (1:100),  $\alpha$ -SMA (1:200), and Muc1 (1:50). The  
14 circRGPD6 detection probe was used for *in situ* hybridization (ISH) according to  
15 manufacturer's protocol (Exiqon, Vedbaek, Denmark). In addition, staining  
16 procedures were performed by using Bench Mark XT automated IHC/ISH slide  
17 staining system.

18 Protocols of fluorescence in situ hybridization (FISH) were as follow. Briefly,  
19 hybridization was performed overnight with circRGPD6 probes. Specimens were  
20 analyzed using a Nikon inverted fluorescence microscope. The circRGPD6 probe for  
21 FISH is 5'-TTGAAGCCAGGTAGTGAAAG-3'. This assay was repeated three  
22 times.

23 We graded IHC/ISH status based on the combination synthetical evaluation of  
24 quantity and intensity of positive cells. Briefly, staining intensity index was grouped  
25 into four grades: negative-0 point, weak-1 point, moderate-2 points, and strong-3  
26 points. Percentage of positive cells was segmented into 5 ranks: 0 point (0%), 1 point  
27 (1% ~ 24%), 2 points (25% ~ 49%), 3 points (50% ~ 74%), and 4 points (75% ~  
28 100%). The total score of both determined the status of YAF2 expression: negative (0  
29 ~ 3 points) and positive ( $\geq 4$  points).

30 In addition, we randomly analyzed of circRGPD6 expression in 22 clinical  
31 samples with breast cancer and their adjacent healthy breast tissue samples. The  
32 specimens obtained from female patients who hospitalized in SYSUCC from January

1 2015 to May 2015.

## 2 **RNA isolation and quantitative RT-PCR (qRT-PCR)**

3 Total RNA was extracted from flash-frozen tissue samples or cultured cells using  
4 TRIzol Reagent (Invitrogen), according to the manufacturer's instructions. For RNA  
5 retro-transcription, the SuperScript VILO cDNA Synthesis Kit was performed  
6 (Thermo Fisher Scientific). For the detection of circRNAs and their linear  
7 counterparts, cDNA samples were analysed by quantitative real-time PCR using  
8 PowerUp SYBR Green Master Mix (Thermo Fisher Scientific). For the RNA  
9 extracted in CLIP experiments, quantitative real-time PCR was performed on cDNAs  
10 using MyTaq Red DNA Polymerase (Bioline) according to the manufacturer's  
11 instructions. The samples were then loaded on a 2.5% agarose gel. All the images  
12 were captured using the Molecular Imager ChemiDoc XRS + (Bio-Rad), and the  
13 densitometric analyses were performed using the associated Image Lab software  
14 (Bio-Rad). Each sample was analyzed at least in triplicate.

## 15 **Reverse transcription PCR**

16 Reverse transcription for mRNA and circRNAs was performed with an MMLV-RT  
17 kit (Takara, Mountain View, CA) using random hexamers according to the  
18 manufacturer's protocols. PCR was subsequently performed with a 1:10 dilution of  
19 reverse-transcribed cDNA. The PCR product was run in a 2% agarose gel.  
20 Quantitative real-time reverse transcription polymerase chain reactions were  
21 performed on a 7500 Real-time PCR System (Applied Biosystems, Carlsbad, CA,  
22 USA) with Universal SYBR Green Master Mix (4,913,914,001, Roche, Shanghai,  
23 China). Meanwhile, we used 18s rRNA as the internal references for circRNA.

## 24 **Pull down assay**

25 A total of  $1 \times 10^7$  BCSC were harvested, lysed and sonicated. The TV-circRGPD6  
26 probe was used for incubation with C-1 magnetic beads (Life Technologies) at 25 °C  
27 for 2 hr to generate probe-coated beads. Cell lysate with TV-circRGPD6 probe or  
28 oligo probe was incubated at 4 °C for one night. After washing with wash buffer, the  
29 RNA mix bound to the beads was eluted and extracted with an RNeasy Mini Kit  
30 (QIAGEN) for RT-PCR or real-time PCR.

## 31 **Oligonucleotide transfection**

1 The human breast cell lines MCF-7.SC and XM322 were seeded in a 6-well plate and  
2 incubated at 37 °C in humidified 5% CO<sub>2</sub> atmosphere overnight. CircRGPD6 siRNA,  
3 miRNA mimics and inhibitors (RiboBio, Guangzhou, China) were transfected by  
4 Lipofectamine RNAiMax (Life Technologies) according to the manufacturer's  
5 protocol.

#### 6 **Northern blot analysis**

7 Digoxin-labeled DNA probes (351 nt), spanning the back-splice junction of  
8 circRGPD6, were prepared from cDNA using PCR DIG Probe Synthesis Kit (Roche,  
9 Mannheim, Germany). Total RNA (10 µg) denatured in formaldehyde was resolved on  
10 1% agarose-formaldehyde gel and transferred onto a Hybond-N+ nylon membrane  
11 (Buckinghamshire, UK). Membranes were crosslinked, pre-hybridized in DIG Easy  
12 Hyb (Roche), following hybridized with DIG-labeled DNA probes overnight. After  
13 stringent washing, the membranes were incubated with alkaline phosphatase  
14 (AP)-conjugated anti-DIG antibodies (Roche). Immunoreactive bands were visualized  
15 using chemiluminescent substrate CSPD (Roche) followed by exposure to X-ray film.

#### 16 **Clonal pair-cell analysis**

17 In brief, MCF-7.SC and XM322 ( $5 \times 10^6$ ) cells were transfected with GFP-labeled  
18 TV-circRGPD6 plasmid for 48 h, stained with 2 µL DAPI (10 µg/mL) for 5 min, and  
19 counterstained with anti-CD44-PE (1:200) for 30 min, respectively. Initially,  
20 GFP-labeled BCSC were purified and collected. Next, images were acquired by an  
21 inverted epifluorescence microscope system and further analyzed by digital confocal  
22 microscopy. Similarly, while we evaluated the association of loss of CD44 and  
23 p-H2AX expression in BCSC, clonal pair-cell analysis was performed. In brief,  
24 MCF-7.SC and XM322 ( $5 \times 10^6$ ) cells were transfected with GFP-labeled p-H2AX  
25 plasmid for 48 h, stained with 2 µL DAPI (10 µg/mL) for 5 min, and counterstained  
26 with anti-CD44-PE (1:200) for 30 min, respectively. Preliminarily, GFP-labeled  
27 BCSC were purified and collected. Next, images were acquired by an inverted  
28 epifluorescence microscope system and further analyzed by digital confocal  
29 microscopy.

#### 30 **Western blot analysis**

31 Protein extracts of BCSC (10µg protein) were detached by 10 % SDS-PAGE and

1 electrophoretically transferred to polyvinylidene difluoride (PVDF) membrane.  
2 Following, antibodies were assayed. Antibodies of CD44, Vimentin, E-cadherin,  
3 N-cadherin, HIF-1 $\alpha$  and YAF2 were purchased from Cell Signaling Technology. We  
4 performed GAPDH as internal control. Signals were visualized using the Supersignal  
5 West Pico ECL chemiluminescence detection kit and Kodak X-ray film.

## 6 **Flow cytometry**

7 Fluorescence-activated cell sorting (FACS) was performed to determine the  
8 CD44<sup>+</sup>CD24<sup>-</sup> subpopulation, and proportion of Lin or ALDH1 in BCSC by using  
9 CD44<sup>+</sup>, CD24<sup>-</sup>, Lin-PE and ALDH1-PE antibodies (Sigma). To develop adherent cells  
10 in differentiation culture, we added 0.50% bovine serum albumin to nutrient solution  
11 for 12 days. Differentiation capabilities of BCSC were further analyzed by flow  
12 cytometry. Briefly, BCSC ( $5 \times 10^7$  cells) were incubated with Muc1-PE or  $\alpha$ -SMA-PE  
13 antibody for 48 hr (Sigma). Positive GFP-labeled cells were purified by FACS. Then,  
14 isolated cells were contained with 2  $\mu$ l DAPI (10  $\mu$ g/mL) for 5 min. We used  
15 CellQuest software to analyze the data.

## 16 **Clonogenicity assays in soft agarose**

17 Clonal expansion ability of BCSC was analyzed by clonogenicity assays in soft  
18 agarose. Briefly, BCSC were transfected with Negative Ctrl (NC) plus miR-Ctrl,  
19 TV-circRGPD6 plus miR-Ctrl, NC plus miR-26b and TV-circRGPD6 plus miR-26b,  
20 respectively. Next, 2% solidified agar was paved as base agar in 6-well. BCSC were  
21 seeded at  $3 \times 10^3$  cells per well coated with a thin layer of 1% soft agarose. The  
22 experiment was terminated at day 21, and wells were Giemsa-stained. Spheres with  
23 50  $\mu$ m or greater in diameter were determined. We performed all experiments for  
24 three times.

## 25 **Establishment of serial passages of luciferase-labeled and green fluorescent** 26 **protein (GFP)-labeled BCSC lineages**

27 Protocol of serial passages of cell lines expressing firefly luciferase was previously  
28 described.<sup>1-3</sup> Briefly, BCSC were transfected with pEF1a-Luc-Neo, and filtrated with  
29 G418 for 14 days. Next, G418-resistant clones, referred as luciferase-labeled BCSC,  
30 were collected and maintained for further *in vivo* experiments. Similarly, BCSC were  
31 transfected with pcDNA3.1-EGFP-NEO plasmid. Then GFP-labeled BCSC were

1 selected out with G418 for 14 days. Following, GFP expression and survival BCSC  
2 were cultured. Here, G418-resistant clones were designated as GFP-labeled BCSC.

### 3 **Determination of synergistic effects of TV-circRGPd6 and docetaxel**

4 GFP-labeled BCSC were transfected with Ctrl, TV-circRGPd6, si-circRGPd6,  
5 docetaxel, as well as TV-circRGPd6 plus docetaxel. We used a spinning disk confocal  
6 long-term live cell imaging system (Olympus CV1000) to maintain and photograph  
7 these cells in real time. Mammospheres with 50  $\mu\text{m}$  or greater in diameter were  
8 determined. For the detection of synergistic effects of TV-circRGPd6 and docetaxel,  
9 BCSC were treated with Ctrl, 2 nM docetaxel (Aventis Pharma, France),<sup>4</sup> presence or  
10 absence of docetaxel after 0.1 nM TV-circRGPd6 transduction during in the  
11 corresponding period (0 day, 1 day, 3 days and 5 days) respectively. GFP intensity was  
12 measured with MetaMorph image acquisition and analysis software (Molecular  
13 Devices). All experiments were repeated for five times.

### 14 **MTT assay of cell proliferation**

15 MTT (Sigma) assay was used to assess MCF-7.SC cell viability according to the  
16 manufacturer's instructions. Each assay was repeated five times.

### 17 **Terminal deoxynucleotidyl transferase-mediated dUTP nick-end labeling** 18 **(TUNEL) test**

19 TUNEL staining for apoptosis was performed using the ApopTag Plus Peroxidase In  
20 Situ Apoptosis Detection kit (Invitrogen CA, USA) according to the manufacturer's  
21 instructions.

### 22 **Constructs and transfection**

23 Detailed information of the VISA plasmid, hTERT promoter-driven VISA  
24 nanoparticle delivery of circRGPd6 (TV-circRGPd6) were described previously.<sup>1-3,</sup>  
25<sup>5-7</sup> Briefly, the circRGPd6 shRNA was incorporated into the Bgl II/Nhe I sites of the  
26 plasmid pGL3-T-VISA-Luc; following, the T-VISA-circRGPd6 fragment of  
27 pGL3-T-VISA-circRGPd6 was subcloned into the Not I and Sal I sites of pUK21.  
28 Transient transfections were performed as previously described.<sup>1, 2</sup> Briefly, BCSC  
29 were transiently transfected with 1 $\mu\text{g}$  of the hTERT-VISA plasmid DNA using  
30 extruded DOTAP: cholesterol liposomes in 24-well plates (N/P ratio of 2:1). Silence  
31 sequence of circRGPd6: GTTGCTCAAGAGCCTCCATTA. For site-specific



1 mutagenesis, we mutated the regions in the circRGP6-3'UTR and YAF2-3'UTR  
2 complementary to the seed sequence of miR-26b using the QuikChange II  
3 Site-Directed Mutagenesis Kit according to manufacturer's protocol.

4 In the evaluation of the effect of circRGP6/miR-26b/YAF2 axis on  
5 mammosphere formation of BCSC, both MCF-7.SC and XM322 were transfected  
6 with Ctrl, TV-circRGP6, miR-26b, miR-26b plus TV-circRGP6, miR-26b plus  
7 YAF2 3'UTR, and miR-26b plus YAF2 3'UTR-mut-both. We used a spinning disk  
8 confocal long-term live cell imaging system (Olympus CV1000) to maintain and  
9 photograph these cells in real time. Mammospheres with 50  $\mu\text{m}$  or greater in diameter  
10 were determined. All experiments were repeated for three times.

### 11 **Tumor transplantation experiments**

12 To identify the stem-like properties of metastatic breast cancer cells, we generated  
13 orthotopic xenograft models of breast cancer MCF-7 cells. In total, MCF-7 cells were  
14 maintained in 12 athymic female non-obese diabetic/severe combined  
15 immunodeficient (NOD/SCID) mice to produce both primary tumor and  
16 dissemination for 4 weeks. Following, the stem-like properties of primary tumors  
17 were compared with their corresponding disseminated tumors.

18 To test early dissemination capabilities of MCF-7 *in vivo*, we generated  
19 orthotopic xenograft models of luciferase-labeled MCF-7 and their luciferase-labeled  
20 primary breast cancer cell-bearing. The details were described previously.<sup>1-3, 5, 6, 8</sup>  
21 Briefly, NOD/SCID mice were injected subcutaneously into the left fourth mammary  
22 gland with  $1 \times 10^5$  cells primary breast cancer cells or MCF-7 using a 25-gauge needle  
23 ( $n = 9$  mice per group). After transplantation, mice were monitored using the *In Vivo*  
24 Imaging System (IVIS, Xenogen, Alameda, CA) to early dissemination for 10 days.  
25 All the mice were then sacrificed and tissue was collected to characterize the  
26 capability of tumor formation.

27 To determine BCSC mediate breast cancer metastasis, ten luciferase-labeled  
28 BCSC-bearing mice were maintained (MCF-7.SC and XM322, 5 mice per group). All  
29 of mammosphere formation, self-renewal capacity,  $\text{CD44}^+\text{CD24}^-\text{Lin}^{-\text{low}}\text{ALDH1}^+$   
30 expressions and pluripotency capability of early disseminated tumors in the  
31 above-mentioned 10 mice were analyzed.

1 With a goal of exploring the potential synergy effect of TV-circRGPD6 plasmid  
2 and docetaxel in eradicating metastasis of breast cancer cells *in vivo*, a suspension of  
3 XM322-luciferase cells ( $5 \times 10^6$ ) was inoculated at the left fourth inguinal mammary  
4 gland of NOD/SCID mice using a 30-gauge needle. Tumor formation was monitored  
5 by palpation and tumor size was measured twice per week using calipers. We  
6 developed and maintained XM322 lineages with expression of firefly luciferase for 40  
7 days (Day 0). When the tumors developed metastatic tumors with nonsignificant  
8 expressions of firefly luciferase, the mice were noninvasively imaged using the *IVIS*  
9 *In Vivo* Imaging System (Xenogen, Alameda, CA) to confirm tumor growth and then  
10 randomly assigned to one of five treatment groups (n = 3 mice per group). Each group  
11 of mice received 100  $\mu$ L of DNA-liposome complexes that contained liposomal (Ctrl)  
12 alone, si-circRGPD6 liposomal complexes (10  $\mu$ g qod), TV-circRGPD6 liposomal  
13 complexes (10  $\mu$ g qod), doxorubicin (10 mg/kg qod for 5 times) alone, and  
14 TV-circRGPD6 liposomal complexes (10  $\mu$ g qod) plus doxorubicin (10 mg/kg qod for 5  
15 times), respectively. Tumor progression was monitored daily using the *IVIS* system.  
16 The luciferase test was performed for the following 20 days (Day 20) investigation  
17 and then the data were analyzed. Fine needle aspirations on mice were done according  
18 to standard cytopathologic practice under inhaled general anesthesia (isoflurane)  
19 using 10-mL syringes and 25-gauge needles. Fine needle aspirations were done at  
20 baseline for all mice and after 20 days of therapy for each of the primary tumors,  
21 disseminated tumor and disseminated tumor. Quantitative RT-PCR of circRGPD6  
22 expression, FACS analysis CD44<sup>+</sup>CD24<sup>-</sup> subpopulation and determination of firefly  
23 luciferase of BCSC-bearing tumors were performed according to manufacturer's  
24 protocol. Each experiment was repeated more than three times.

25 To evaluate the safety conditions of circRGPD6 treatment to BCSC *in vivo*, a  
26 suspension of XM322 cells ( $1 \times 10^4$ ) was inoculated at the left fourth inguinal  
27 mammary gland of NOD/SCID mice. When the tumors reached to  $\sim 50 \text{ mm}^3$ , the mice  
28 were non-invasively imaged using the *In Vivo* Imaging System (*IVIS*, Xenogen,  
29 Alameda, CA) to monitor tumor growth. Then, all mice were randomly divided into  
30 three treatment groups (10 mice per group). Each group of mice received 100  $\mu$ L of  
31 DNA-liposome complexes that contained TV-circRGPD6 liposomal complexes (10  
32  $\mu$ g qod), si-circRGPD6 liposomal complexes (10  $\mu$ g qod) or liposomal (Ctrl) alone.  
33 The secretion levels of serum alanine transaminase (ALT), aspartate transaminase

1 (AST), blood urea nitrogen (BUN) and creatinine (Cr) were determined with an  
2 automatic analyzer (Roche Cobas Mira Plus; Roche, Mannheim, Germany). Mouse  
3 serum cytokines (TNF- $\alpha$ , IL-6 and IFN- $\gamma$ ) were quantified using the cytometric bead  
4 array kit (CBA; BD Biosciences). The test was repeated more than five times.

5 We performed *in vivo* experiments to determine the ability of TV-circRGPD6  
6 inhibiting stem-like biological properties of metastatic breast cancer. In the beginning,  
7 NOD/SCID nude mice were injected subcutaneously into the right fourth mammary  
8 gland with  $5 \times 10^6$  either immortal healthy mammary epithelial 184A1 cells, primary  
9 XM322 breast cancer cells in 100ml PBS using a 30-gauge needle. Mice were  
10 monitored twice a week, tumor formation was monitored by palpation and tumor size  
11 value was measured in cubic millimeters using calipers. Tumor volume was calculated  
12 using the standard formula: tumor volume = (width<sup>2</sup>  $\times$  length  $\times \pi$ )/6. When the tumors  
13 size reached to  $\sim 50 \text{ mm}^3$ , the mice were randomly assigned to the five treatment  
14 groups (3 mice per group): liposomal (Ctrl) alone, si-circRGPD6 liposomal  
15 complexes (10  $\mu\text{g}$  qod), TV-circRGPD6 liposomal complexes (10  $\mu\text{g}$  qod), doxorubicin  
16 (10 mg/kg qod for 5 times),<sup>9</sup> and TV-circRGPD6 liposomal complexes (10  $\mu\text{g}$  qod)  
17 plus doxorubicin (10 mg/kg qod for 5 times), respectively. Similarly, a suspension of  
18 XM322-luciferase cells ( $1 \times 10^4$ ) was inoculated at the left fourth inguinal mammary  
19 gland of NOD/SCID mice. We selected out mice with tumor dissemination and the  
20 tumor photon signals reached to  $\sim 500 \times 10^6$  photons/second for the following 20 days  
21 intervention.

## 22 **Microarray analyses of mRNA expression profiles**

23 RNA-Seq and microarray analyses were performed on BCSC transfected with  
24 TV-circRGPD6 and si-circRGPD6 for 48 hr. RNA extractions were performed using  
25 Trizol. Synthesis of cDNA was performed using the SuperScript Choice System  
26 according to manufacturer's protocol (Invitrogen Life Technologies, Capital Biochip  
27 Corporation). Microarrays analyses were performed using Affymetrix Genechip  
28 scanner 3000 with Affymetrix Genechip Command Console software. Microarray  
29 experiments were conducted according to the manufacturer's instructions. To select  
30 the differentially expressed genes, we used threshold values  $\geq 2$  and  $\leq -2$  -fold  
31 change and a Benjamini-Hochberg corrected *p* value of 0.05. Gene expressions were  
32 normalized by using Log<sub>2</sub> transformation and then median-centering was used for the

1 adjustment by the Adjust Data function of Cluster 3.0 software. Data was  
2 subsequently analyzed for hierarchical clustering with average linkage (genes which  
3 value more than 100 were evaluated). Finally, we performed tree visualization with  
4 Java Treeview (Stanford University School of Medicine, Stanford, CA, USA). The  
5 results had been submitted to ArrayExpress (accession number E-MTAB-5584,  
6 E-MTAB-7556 and E-MTAB-7557).

## 7 REFERENCES

- 8 1. Lin X, Chen W, Wei F, Zhou BP, Hung MC, Xie X. (2017) POMC maintains  
9 tumor-initiating properties of tumor tissue-derived long-term-cultured breast cancer  
10 stem cells. *Int. J. Cancer* *140*, 2517-2525.
- 11 2. Lin X, Chen W, Wei F, Zhou BP, Hung MC, Xie X. (2017) Nanoparticle Delivery  
12 of miR-34a Eradicates Long-term-cultured Breast Cancer Stem Cells via Targeting  
13 C22ORF28 Directly. *Theranostics* *7*, 4805-4824.
- 14 3. Xie X, Xia W, Li Z, Kuo HP, Liu Y, Li Z, et al. (2007) Targeted expression of  
15 BikDD eradicates pancreatic tumors in noninvasive imaging models. *Cancer Cell*  
16 *12*, 52-65.
- 17 4. Merino D, Whittle J, Vaillant F, Serrano A, Gong JN, Giner G, et al. (2017)  
18 Synergistic action of the MCL-1 inhibitor S63845 with current therapies in  
19 preclinical models of triple-negative and HER2-amplified breast cancer. *Sci. Transl.*  
20 *Med.* *9*, 7049-7059.
- 21 5. Lang JY, Hsu JL, Meric-Bernstam F, Chang CJ, Wang Q, Bao Y, et al. (2011)  
22 BikDD eliminates breast cancer initiating cells and synergizes with lapatinib for  
23 breast cancer treatment. *Cancer Cell* *20*, 341-356.
- 24 6. Li L, Xie X, Luo J, Liu M, Xi S, Guo J, et al. (2012) Targeted expression of  
25 miR-34a using the T-VISA system suppresses breast cancer cell growth and  
26 invasion. *Mol. Ther.* *20*, 2326-2334.
- 27 7. Huang HC, Pigula M, Fang Y, Hasan T. (2018) Immobilization of  
28 Photo-Immunoconjugates on Nanoparticles Leads to Enhanced Light-Activated  
29 Biological Effects. *Small* *1*, e1800236.
- 30 8. Xie X, Li L, Xiao X, Guo J, Kong Y, Wu M, et al. (2012) Targeted expression of  
31 BikDD eliminates breast cancer with virtually no toxicity in noninvasive imaging  
32 models. *Mol. Cancer Ther.* *11*, 1915-1924.
- 33 9. Lu Y, Yue Z, Xie J, Wang W, Zhu H, Zhang E, et al. (2018) Micelles with ultralow  
34 critical micelle concentration as carriers for drug delivery. *Nat. Biomed. Eng.* *2*,  
35 318-325.

## Supplementary Tables S1-4

**Supplementary Table S1.** starBase predicts the miRNAs sponging circRGPD6

| MiRNA ID     | MiRNA Name      | Gene ID      | Ggene Name | Gene Type | Chromosome | Target Sites |
|--------------|-----------------|--------------|------------|-----------|------------|--------------|
| MIMAT0000101 | hsa-miR-103a-3p | NM_001037866 | RGPD6      | circRNA   | chr2       | 8            |
| MIMAT0000104 | hsa-miR-107     | NM_001037866 | RGPD6      | circRNA   | chr2       | 8            |
| MIMAT0000423 | hsa-miR-125b-5p | NM_001037866 | RGPD6      | circRNA   | chr2       | 6            |
| MIMAT0000417 | hsa-miR-15b-5p  | NM_001037866 | RGPD6      | circRNA   | chr2       | 11           |
| MIMAT0000076 | hsa-miR-21-5p   | NM_001037866 | RGPD6      | circRNA   | chr2       | 5            |
| MIMAT0000418 | hsa-miR-23b-3p  | NM_001037866 | RGPD6      | circRNA   | chr2       | 9            |
| MIMAT0000080 | hsa-miR-24-3p   | NM_001037866 | RGPD6      | circRNA   | chr2       | 9            |
| MIMAT0000083 | hsa-miR-26b-5p  | NM_001037866 | RGPD6      | circRNA   | chr2       | 9            |
| MIMAT0000419 | hsa-miR-27b-3p  | NM_001037866 | RGPD6      | circRNA   | chr2       | 10           |
| MIMAT0000086 | hsa-miR-29a-3p  | NM_001037866 | RGPD6      | circRNA   | chr2       | 8            |
| MIMAT0000100 | hsa-miR-29b-3p  | NM_001037866 | RGPD6      | circRNA   | chr2       | 8            |

**Supplementary Table S2.** 12 miRNA expressions were changed following the regulation of circRGP6 in both MCF-7.SC and XM322

| <b>Name of miRNA</b> | <b>Mature sequence</b>  |
|----------------------|-------------------------|
| hsa-miR-103a-3p      | TCATAGCCCTGTACAATG      |
| hsa-miR-24-3p        | CTGTTCCTGCTGAACTGA      |
| hsa-miR-107          | TGATAGCCCTGTACAATGCT    |
| hsa-miR-27a-3p       | GCGGAACTTAGCCACTG       |
| hsa-miR-125b-5p      | TCACAAGTTAGGGTCTC       |
| hsa-miR-27b-3p       | GCAGAACTTAGCCACTGT      |
| hsa-miR-15b-5p       | TGTAAACCATGATGTGCTGC    |
| hsa-miR-148b-3p      | ACAAAGTTCTGTGATGCAC     |
| hsa-miR-26b-5p       | ACCTATCCTGAATTACTIONTGA |
| hsa-miR-23b-3p       | GGTAATCCCTGGCAATG       |
| hsa-miR-29b-3p       | AACACTGATTTCAAATGGTGC   |
| hsa-miR-29a-3p       | TAACCGATTTTCAGATGGTGC   |

**Supplementary Table S3.** Thirty-seven co-target genes of miR-26b based on four algorithms (TargetScan, miRanda, TargetMiner and miRWalk)

| 4 algorithms                                        | 37 co-target genes of miR-26b                                                                                                                                                                                                                                                                              |
|-----------------------------------------------------|------------------------------------------------------------------------------------------------------------------------------------------------------------------------------------------------------------------------------------------------------------------------------------------------------------|
| TargetScan,<br>MIRDB,<br>TargetMiner and<br>miRWalk | As following: ELAVL2, E2F7, RHOQ, PRKCD, SLC38A2,<br>ADAM9, CREBZF, FAM136A, TMCC1, ULK2,<br>PTP4A1, TMEM2, KPNA6, TET3, CXADR, BLOC1S2,<br>ABHD2, ZBTB18, PLOD2, GNA13, TNRC6B, ZNF608,<br>RCOR1, SFXN1, YAF2, HGF, SLC19A2, RCBTB1,<br>PTEN, GTF2A1, ZNF410, USP9X, SACS, CREBRF,<br>REEP4, MAT2A, USP3. |

**Supplementary Table S4.** Clinicopathological features of 165 patients with breast cancer

|                                      | <b>Stage I</b> | <b>Stage II</b> | <b>Stage III</b> | <b>Stage IV</b> |
|--------------------------------------|----------------|-----------------|------------------|-----------------|
| <b>Totality</b>                      | 16             | 58              | 60               | 31              |
| <b>Age (years)</b>                   |                |                 |                  |                 |
| <50                                  | 8              | 35              | 39               | 17              |
| ≥50                                  | 8              | 23              | 21               | 14              |
| <b>Pathogenetic location</b>         |                |                 |                  |                 |
| Left breast                          | 8              | 30              | 27               | 15              |
| Right breast                         | 2              | 28              | 33               | 16              |
| <b>Family history of cancer</b>      |                |                 |                  |                 |
| Absence                              | 14             | 56              | 55               | 28              |
| Presence                             | 2              | 2               | 5                | 3               |
| <b>Histological type</b>             |                |                 |                  |                 |
| Ductal                               | 13             | 56              | 59               | 30              |
| Lobular                              | 3              | 2               | 1                | 1               |
| <b>Pathological grading</b>          |                |                 |                  |                 |
| 1                                    | 4              | 13              | 17               | 3               |
| 2                                    | 4              | 18              | 17               | 8               |
| 3                                    | 8              | 24              | 19               | 16              |
| Undifferentiated                     | 0              | 3               | 6                | 3               |
| Not available                        | 0              | 0               | 1                | 1               |
| <b>ER status</b>                     |                |                 |                  |                 |
| Negative                             | 8              | 31              | 44               | 20              |
| Positive                             | 8              | 27              | 16               | 11              |
| <b>PR status</b>                     |                |                 |                  |                 |
| Negative                             | 8              | 30              | 42               | 19              |
| Positive                             | 8              | 28              | 18               | 12              |
| <b>Herb2 status</b>                  |                |                 |                  |                 |
| Negative                             | 14             | 48              | 50               | 17              |
| Positive                             | 2              | 10              | 10               | 14              |
| <b>Triple-negative breast cancer</b> |                |                 |                  |                 |
| Absence                              | 9              | 45              | 29               | 14              |
| Presence                             | 7              | 13              | 31               | 17              |
| <b>p53 status</b>                    |                |                 |                  |                 |
| Negative                             | 8              | 30              | 19               | 8               |
| Positive                             | 8              | 28              | 41               | 23              |



## Supplementary Figures 1-7

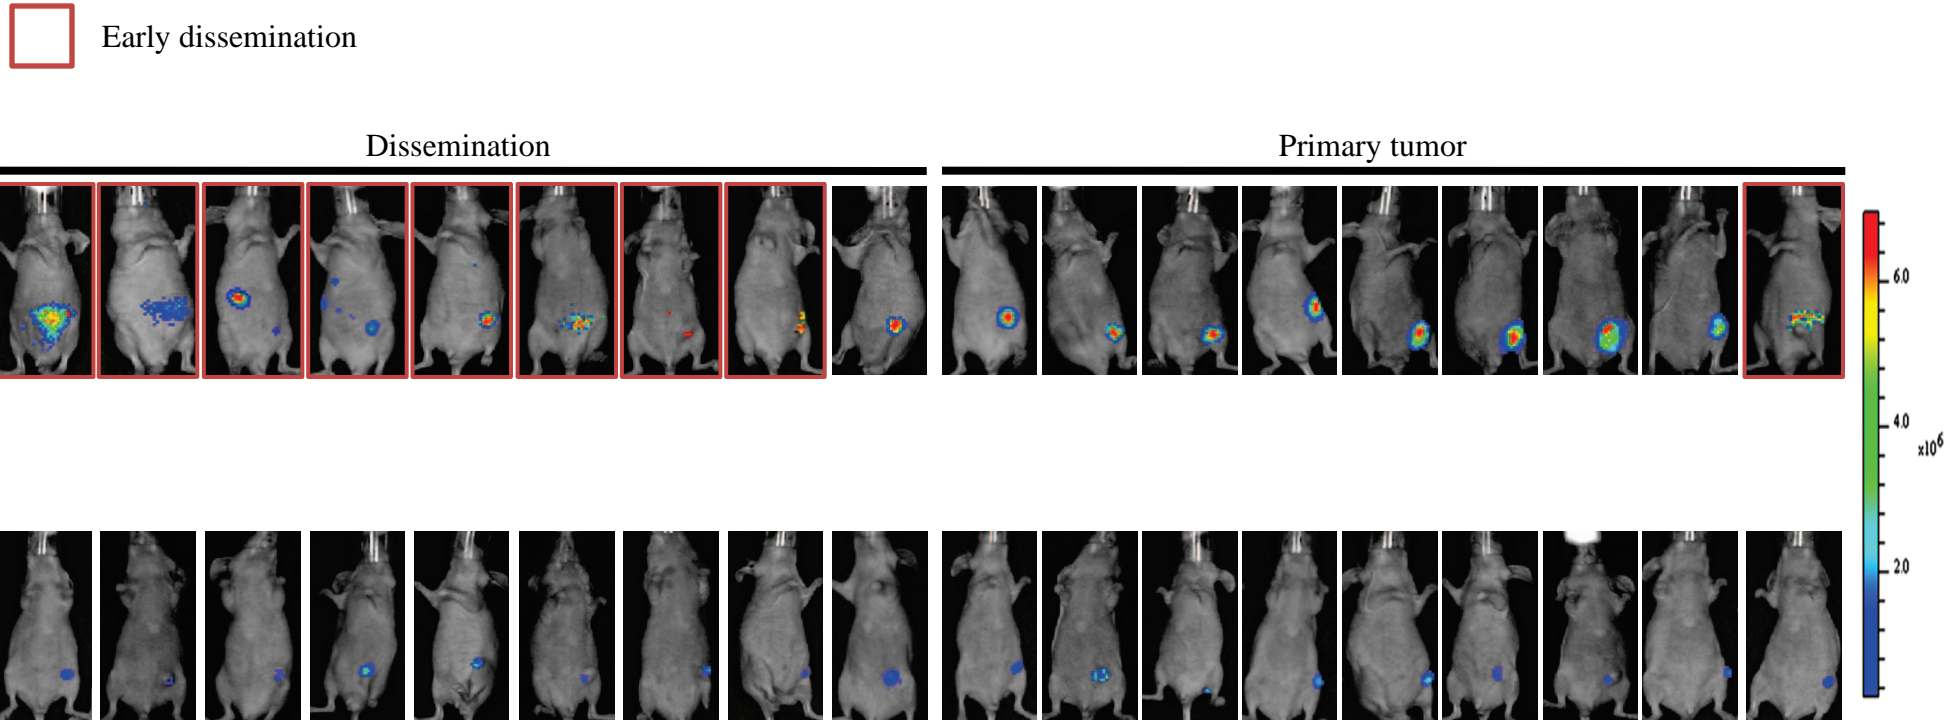

**Figure S1. Monitoring dissemination of primary MCF-7-bearing tumor and disseminated MCF-7-bearing tumor in NOD/SCID mice.** Mice are imaged for 10 days after implantation when palpable tumors formed.

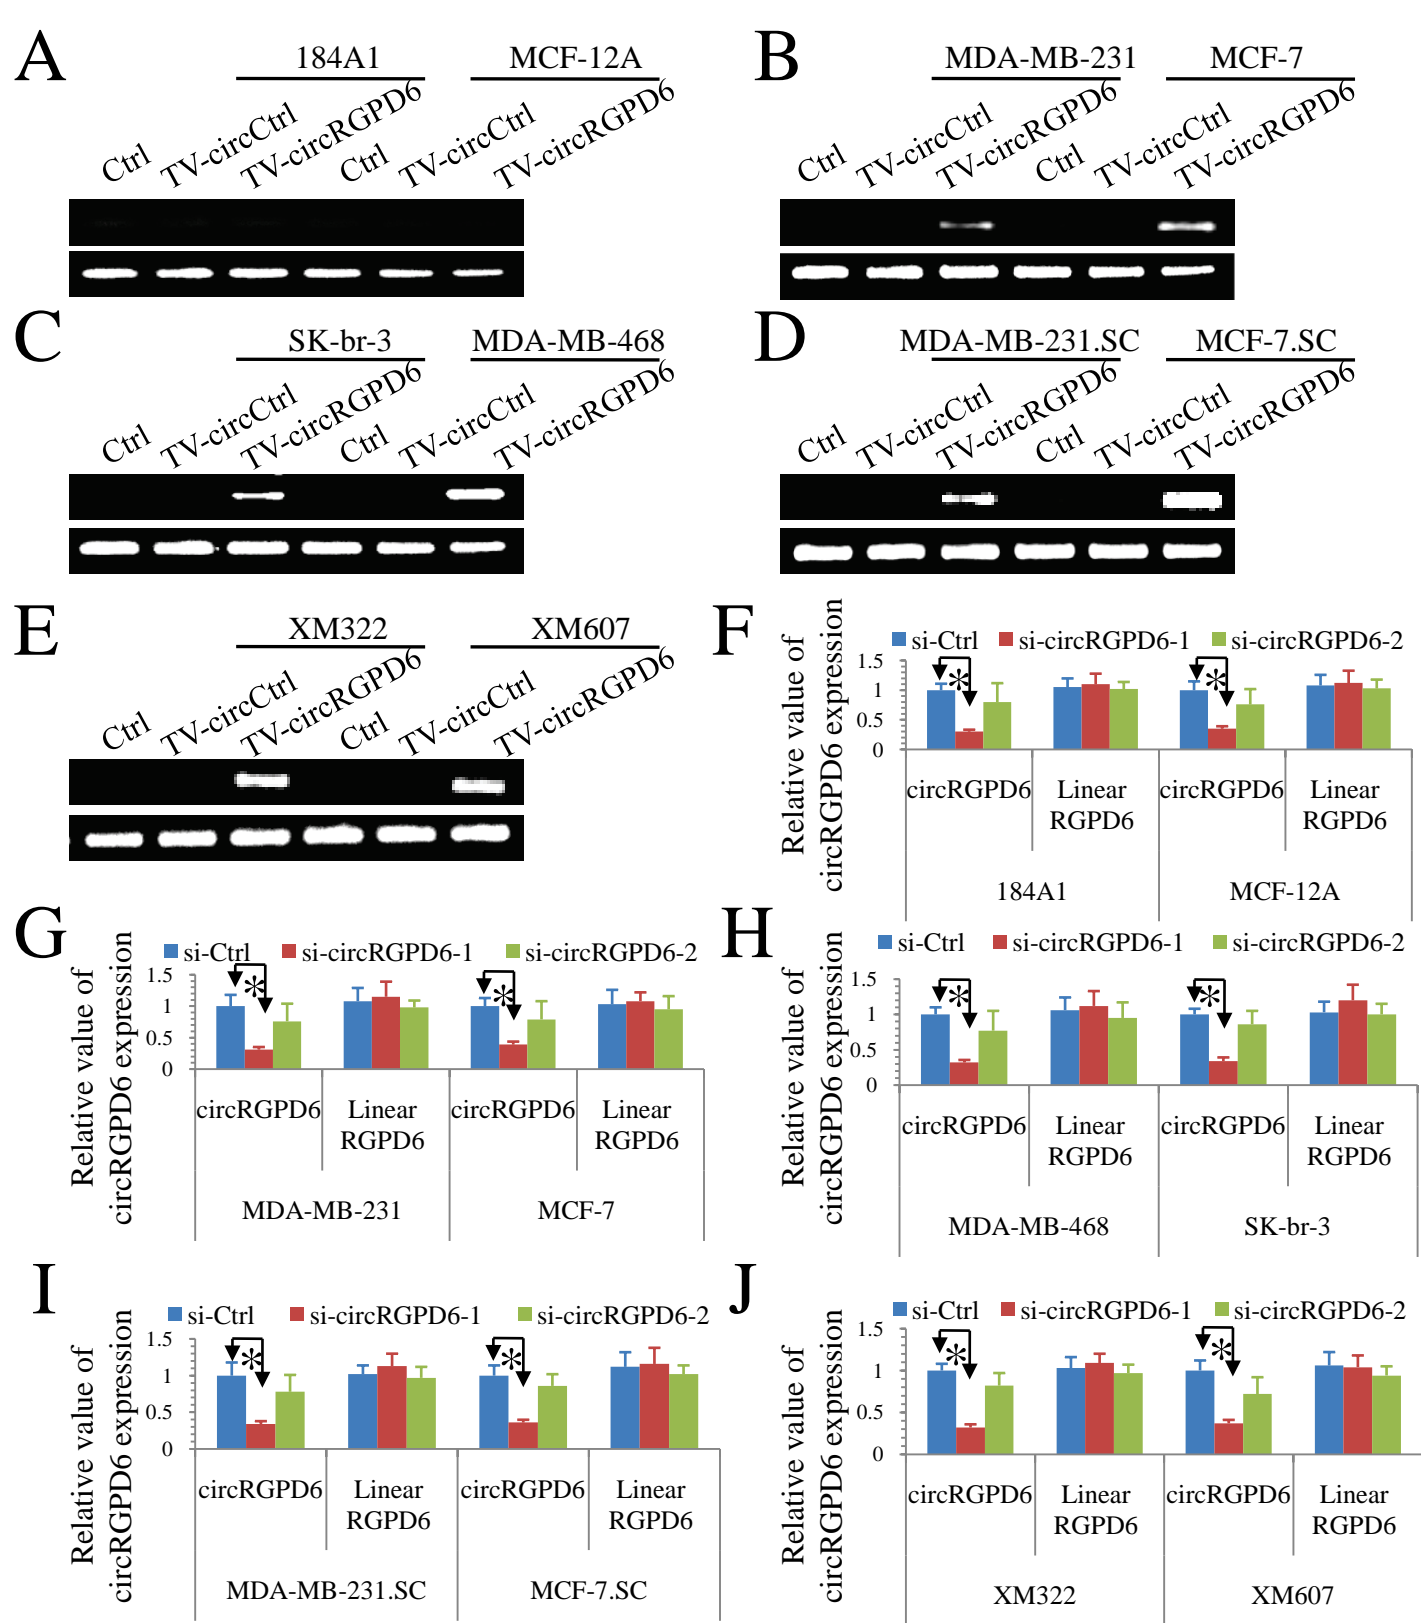

**Figure S2. Determination of the regulators of circRGP6.** (A-E) Reverse Transcription-PCR confirmation of circRGP6 expression in liposomal complex, TV-Ctrl and TV-circRGP6-transfected breast cells: (A) Healthy mammary epithelial cells: 184A1 and MCF-12A; (B) Breast cancer cells: MDA-MB-231 and MCF-7; (C) Breast cancer cells: SK-br-3 and MDA-MB-468; (D) BCSC lineages derived from breast cancer cells: MDA-MB-231.SC and MCF-7.SC; (E) Tumor tissue-derived BCSC: XM322 and XM607. (F-J) qRT-PCR to verify the circRGP6 silencing efficiency and rule out the possibility that circRGP6 siRNA might exert effects on the mRNA level of circRGP6 (linear circRGP6) in multiple breast cells: (F) 184A1 and MCF-12A; (G) MDA-MB-231 and MCF-7; (H) SK-br-3 and MDA-MB-468; (I) MDA-MB-231.SC and MCF-7.SC; (J) XM322 and XM607. Each experiment was repeated at least in triplicate. \* indicates  $P < 0.05$ . Statistical analysis was performed using the paired  $t$ -test.

A

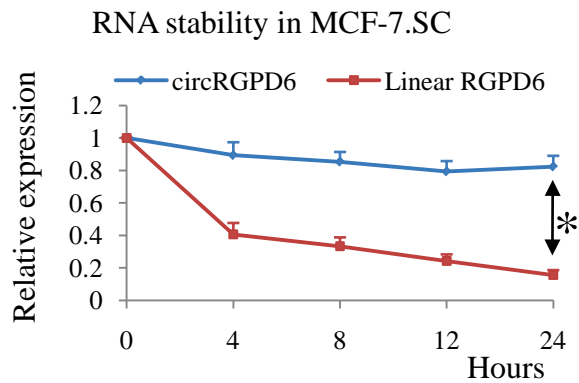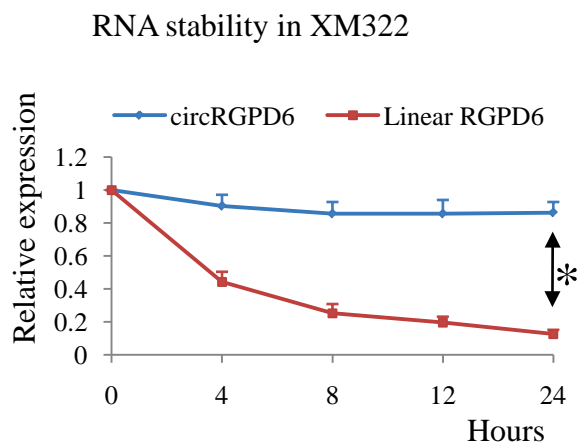

B

MCF-7.SC

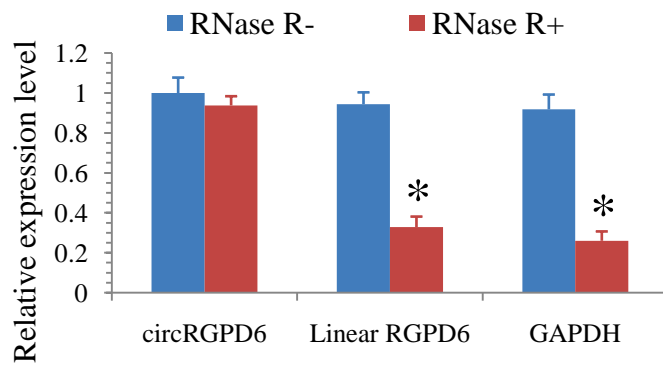

XM322

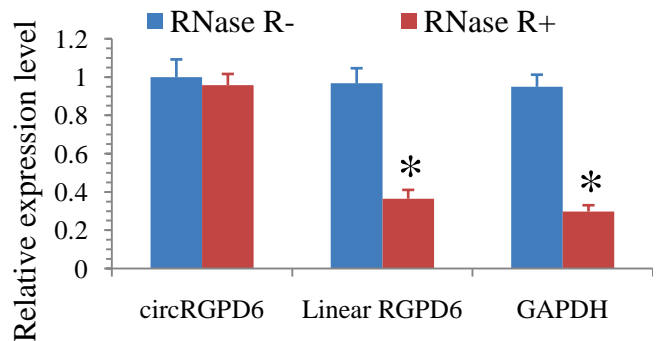

C

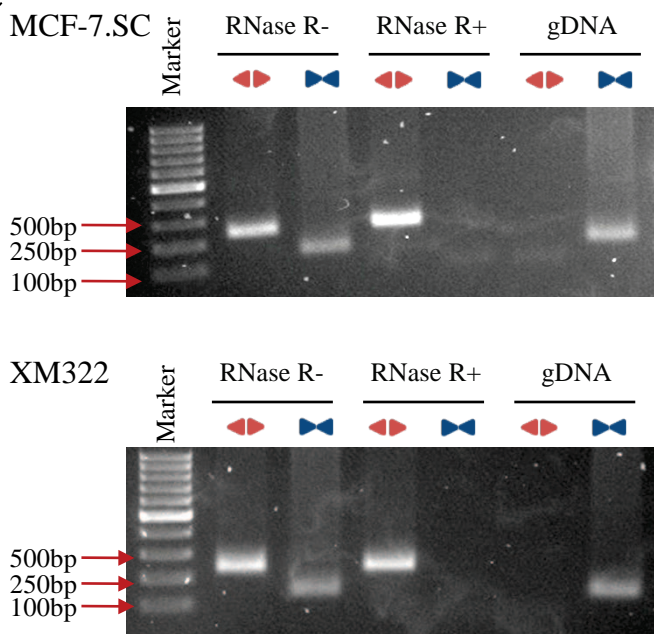

D

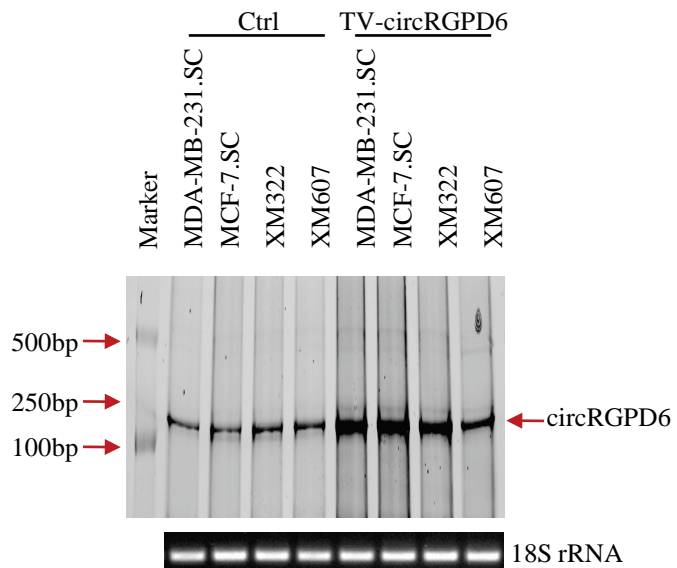

**Figure S3. Characteristics of circRGPD6 in BCSC.** (A) qRT-PCR for the expression of circRGPD6 and RGPD6 mRNA in both MCF-7.SC and XM322 treated with Actinomycin D, a transcription inhibitor. (B) qRT-PCR assay with specially designed divergent and convergent primers and indicated that circRGPD6, rather than linear RGPD6 or GAPDH, could resist digestion by RNase R. (C) Expression levels of the back-spliced and canonical forms of RGPD6 in the presence or absence of RNase R supplementation in cDNA and gDNA from both MCF-7.SC and XM322 by PCR and an agarose gel electrophoresis assay. (D) Ctrl (empty vector) and TV-circRGPD6 were transfected into BCSC. After 24 hr of transfection, total RNA was treated with RNase-R and subjected to Northern blotting using circRGPD6 junction probes. Each experiment was repeated at least three times. \* indicates  $P < 0.05$ . Statistical analysis was performed using the paired  $t$ -test.

**A**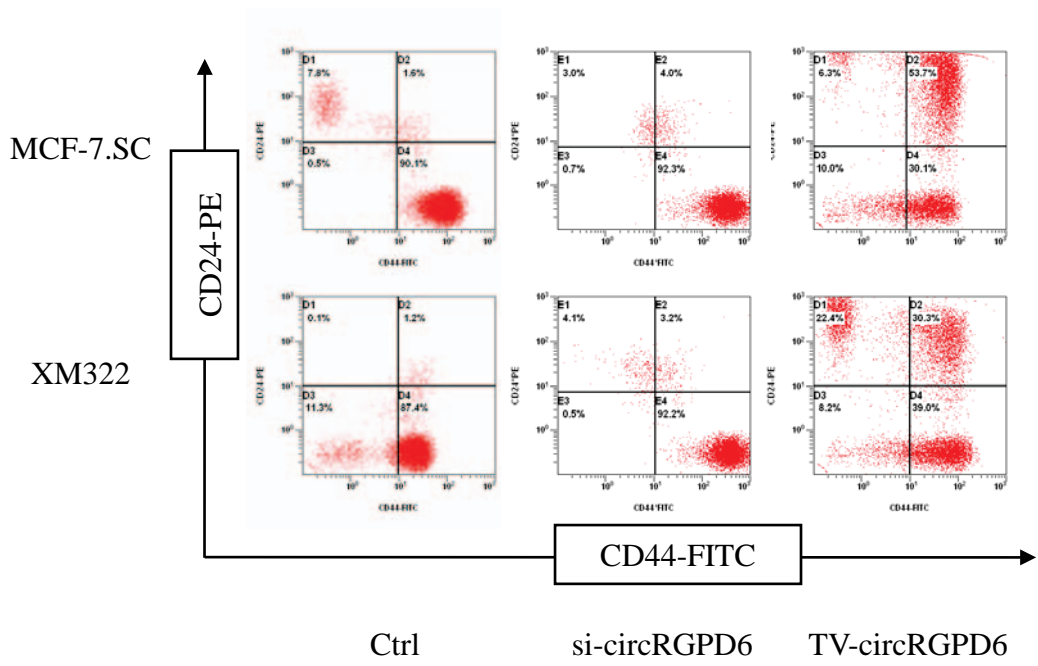**B**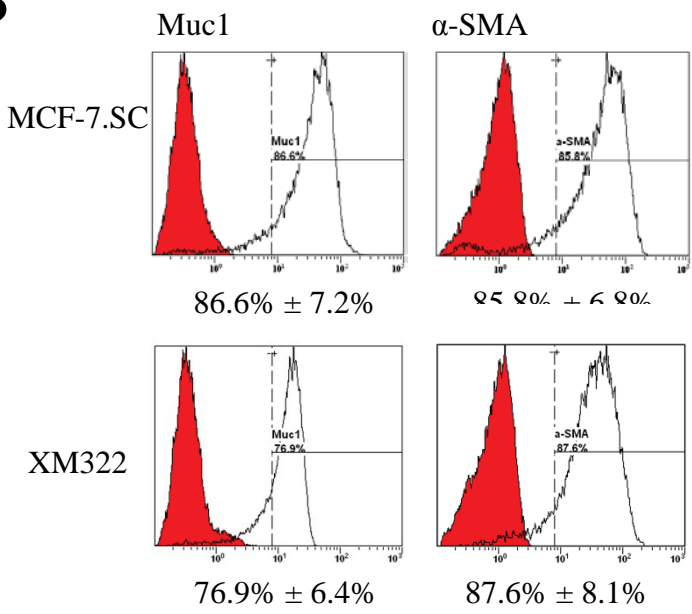**C**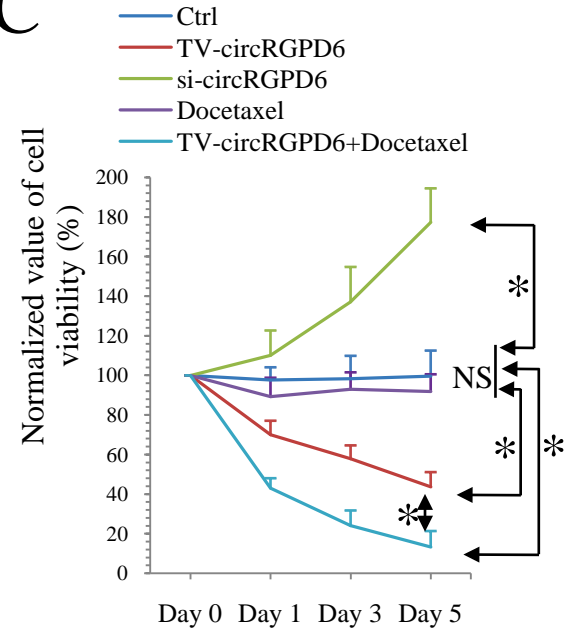

**Figure S4. TV-circRGP6 inhibits tumor-initiating properties of BCSC *in vitro* (related to Figure 4).** (A) Representative images of TV-circRGP6 robustly decreasing the CD44<sup>+</sup>CD24<sup>-</sup> subpopulation of MCF-7.SC and XM322. (B) TV-circRGP6 enhanced the pluripotency in both MCF-7.SC and XM322. After differentiation, TV-circRGP6 treated BCSC had increased Muc1-positive cells (Muc1-PE) accounted for approximately 80% (left panel) and increased α-SMA-PE positive cells accounted for approximately 85% (right panel). Peaks labeled in red represent isotype control. (C) MTT assays indicated that TV-circRGP6 synergizes with docetaxel to eradicate XM322. Each experiment was repeated at least three times. \* indicates  $P < 0.05$ ; NS: not significant. Statistical analyses were performed using multi-factor analysis of variance (univariate).

- Primary tumor
- Dissemination
- Early dissemination

Representative image

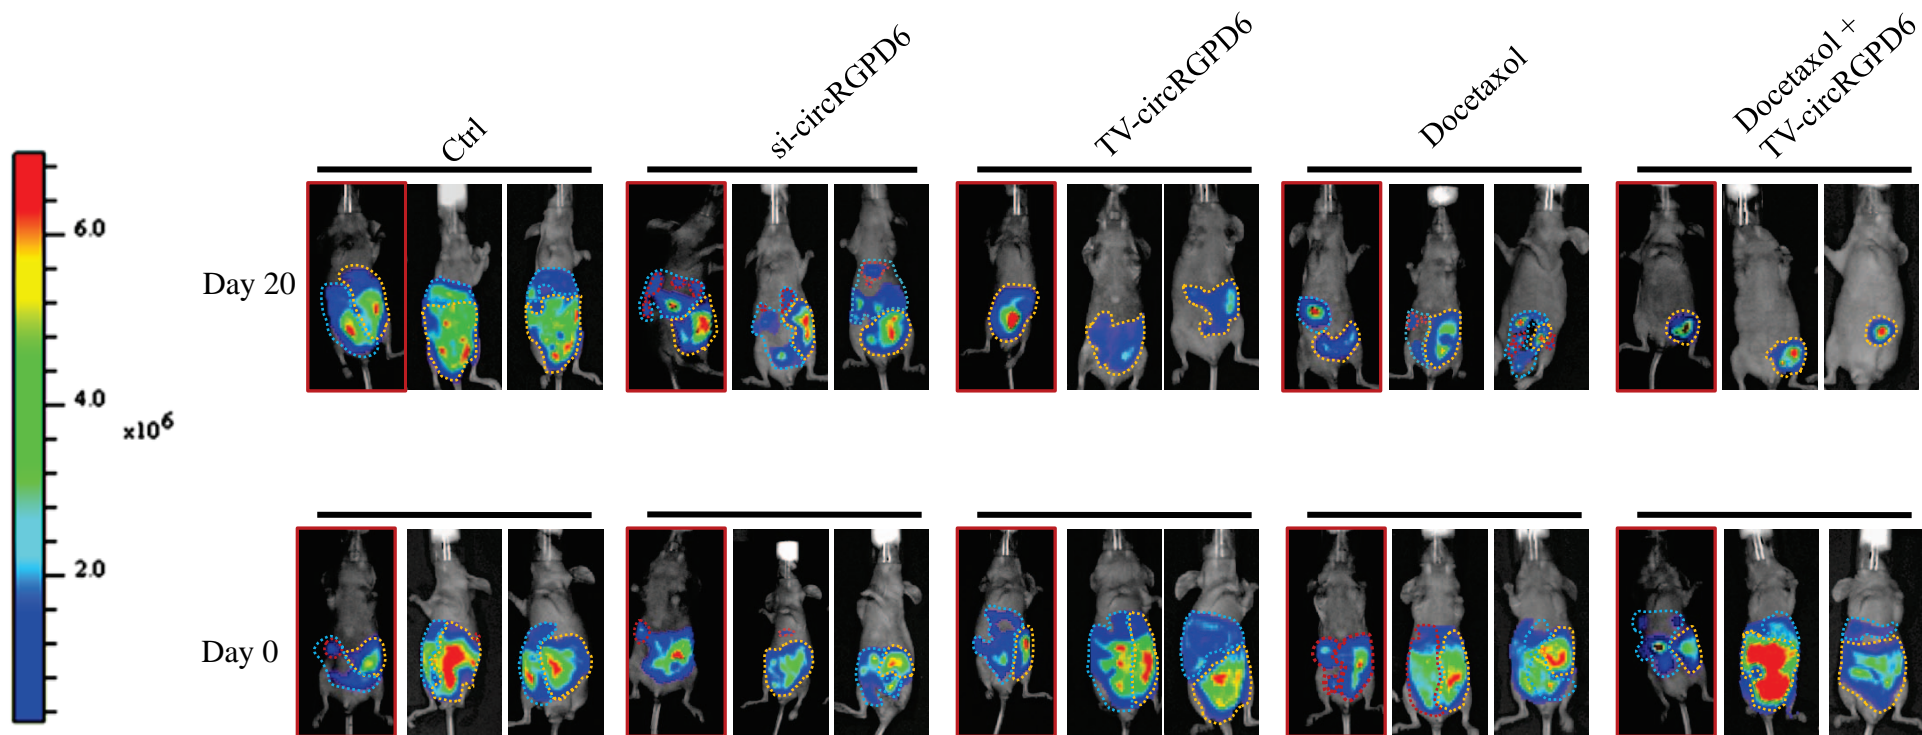

**Figure S5. Photon signals of tumors in the XM322-bearing mice with Ctrl, si-circRGPD6, TV-circRGPD6, docetaxol alone, and Docetaxol plus TV-circRGPD6 (3 mice per group).**



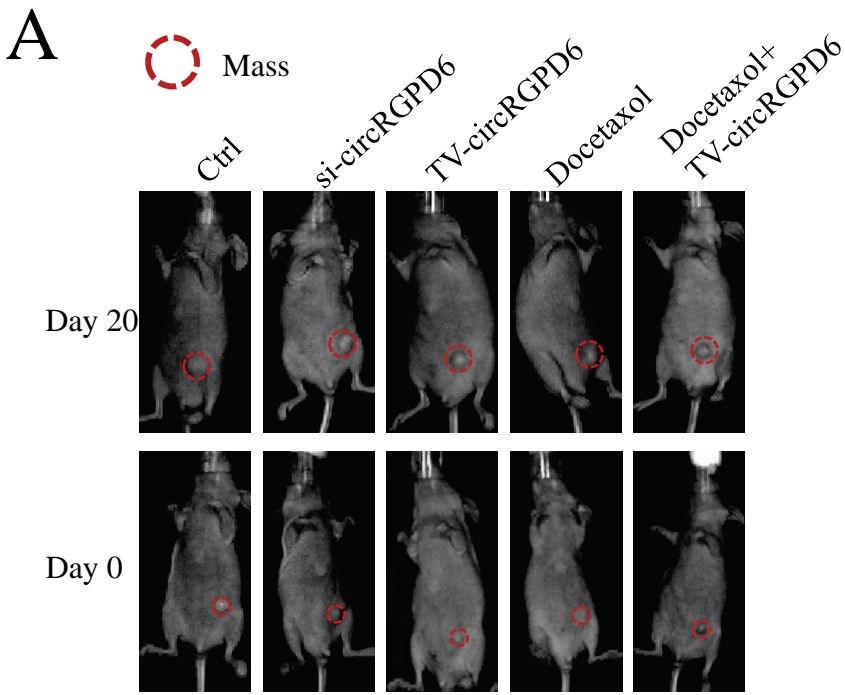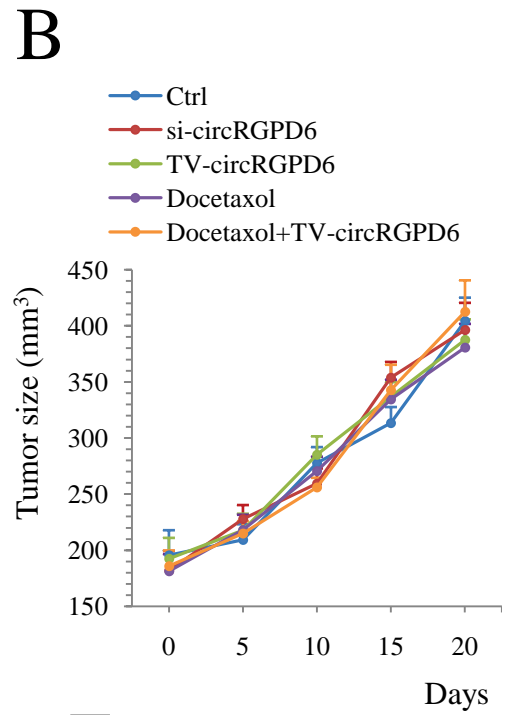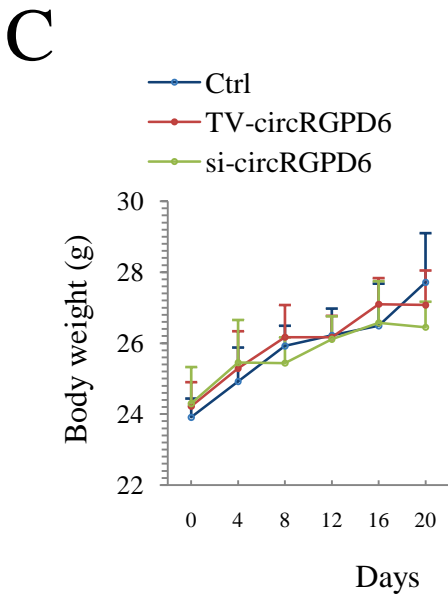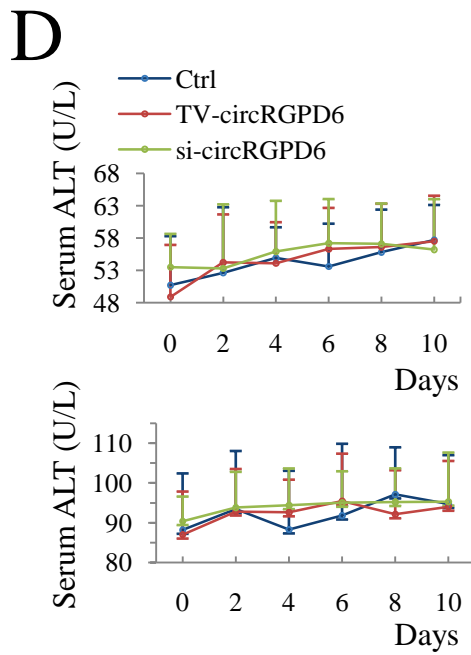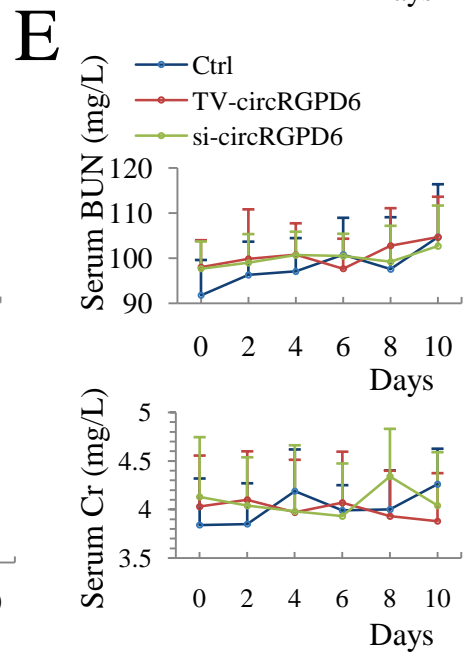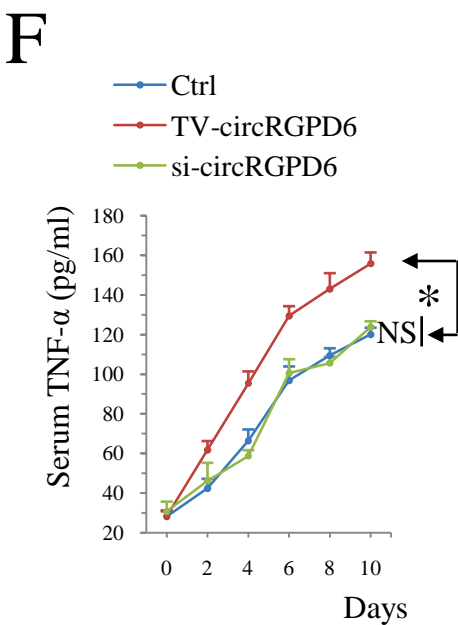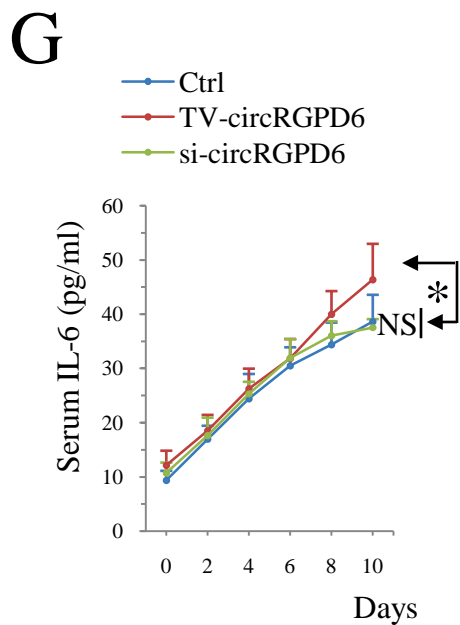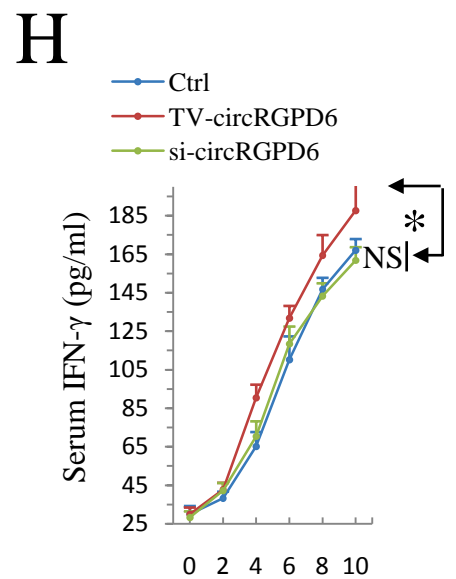

**Figure S6. TV-circRGP6 treatment for BCSC-bearing mice is well-tolerated *in vivo*.** (A-B) Neither TV-circRGP6 alone nor docetaxel alone plays an inhibitory effect on 184A1-bearing tumors *in vivo* (10 mice per group). Representative images (A) and statistical results (B) of xenografts growing in nude mice for 20 days after injection with 184A1. (C) Body weight of all nude mice in the experiment showed no significant change. (D) Serum ALT (upper panel) and AST (lower panel) of XM322-bearing mice with treatment of Ctrl, TV-circRGP6 and si-circRGP6 for 10 days. (E) Serum BUN (upper panel) and Cr (lower panel) of XM322-bearing mice with treatment of Ctrl, TV-circRGP6 and si-circRGP6 for 10 days. (F-H) Serum concentrations of TNF- $\alpha$  (F), IL-6 (G) and IFN- $\gamma$  (H) of XM322-bearing tumors with treatment of Ctrl, TV-circRGP6 and si-circRGP6 for 10 days. Each experiment was repeated more than five times. \* indicates  $P < 0.05$ ; NS: not significant

**A**

MCF-7.SC

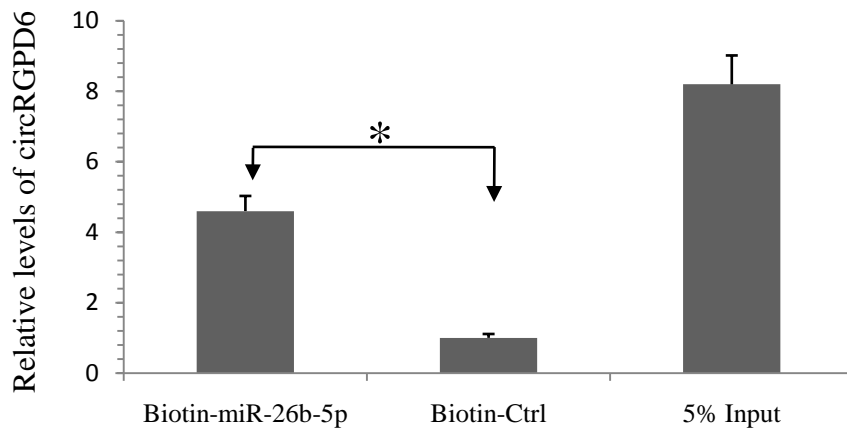

XM322

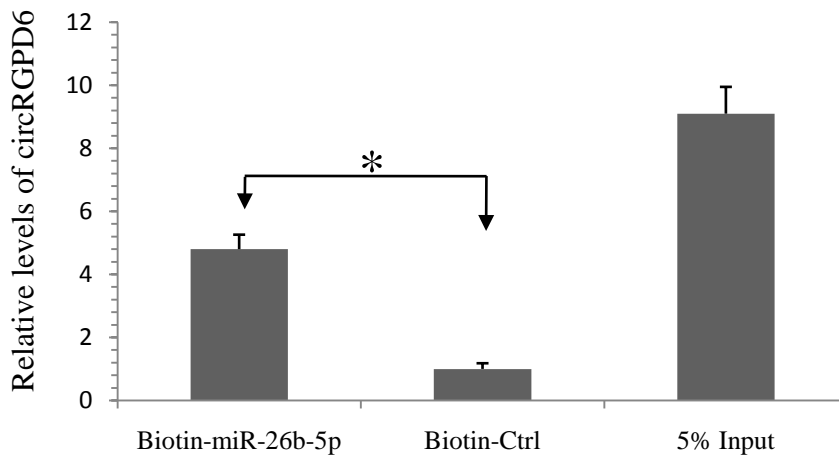**B**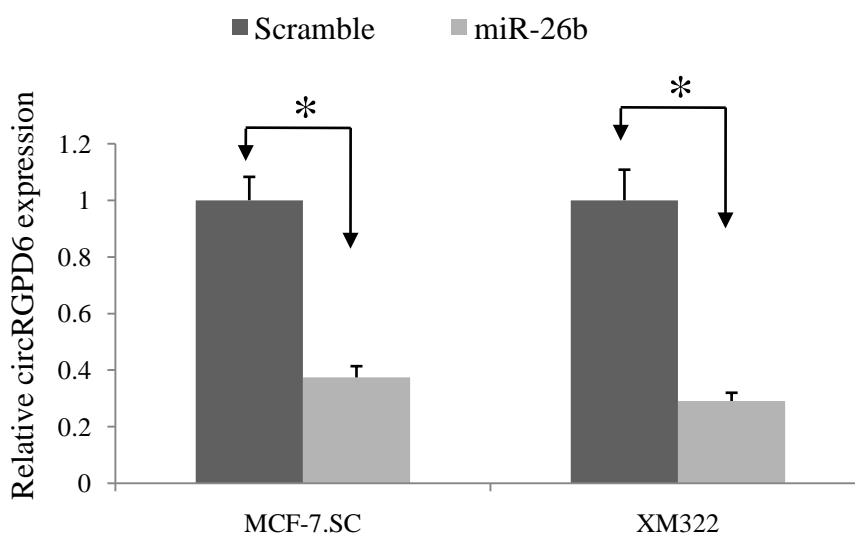

**Figure S7. TV-circRGP6 serves as a miRNA sponge for miR-26b (related to Figure 6).** (A) We used a specific biotin-labelled miR-26b-5p probe to successfully capture circRGP6 compared to the Ctrl group in MCF-7.SC (upper panel) and XM322 (lower panel). (B) qRT-PCR analyses of circRGP6 expressions following transfection with a scrambled Ctrl, miR-26b mimics in MCF-7.SC and XM322. Statistical analysis was performed using the paired *t*-test.
